# Supplementary material
Source: PubMed Central journal article supplement (PMC3139801)
Supplement: NIHMS289055-supplement-3.pdf [file NIHMS289055-supplement-3.pdf]

appropriate controls. The CMV IL-10-treated monocyte supernatant increased gCSC migration in a chemotaxis assay compared with those grown in control medium. This experiment was done in duplicate. \* $P=0.013$

**Fig. 6. Schema demonstrating the interrelationship between the gCSC and the monocyte.**

CMV infects the neural progenitor cell, the precursor to the gCSC, by surface attachment to the PDGF- $\alpha$  receptor. The CMV may possibly integrate into the host genome or interact with the STAT3 pathway to induce gliomagenesis. Viral activity, including the production of CMV IL-10, together with monocyte chemokines elaborated by the gCSC result in the preferential migration and conversion of the monocyte to an immunosuppressive, tumor-supportive M2 M $\Phi$ /microglia (M2; tumor-associated M $\Phi$ ).

**Supplementary Fig. 1. CMV antigens are expressed in glioma cell lines.** (A) U251 is shown staining positive for CMV pp65, IE1, and gB. Identical data was obtained for U87 and D54 (data not shown). (B) HL-60 is shown staining negative for CMV antigens.
